# Supplementary material for: Failure to Thrive: Impaired BDNF Transport along the Cortical–Striatal Axis in Mouse Q140 Neurons of Huntington’s Disease
Source: MDPI journal article supplement (doi:10.3390/biology12020157), 2023-01-19
Supplement: s1 [file s1]

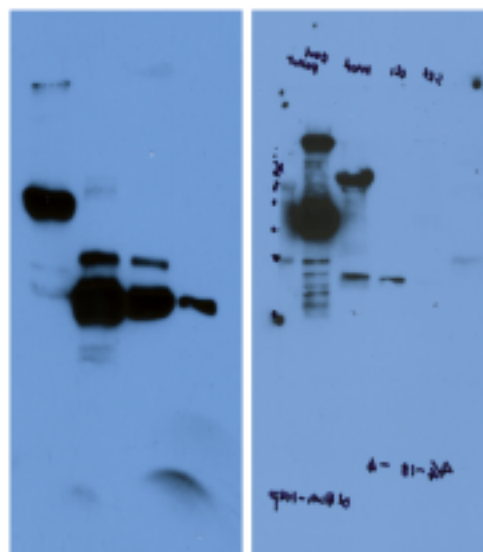

For Sup Fig2B (anti BDNF and Biotin)

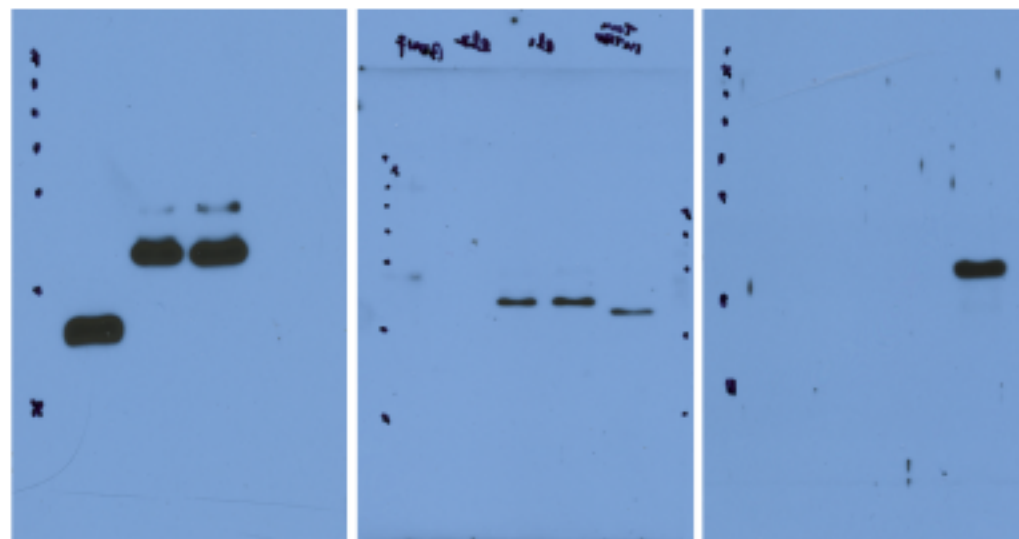

For Sup Fig2C (anti BDNF, Biotin and Tau)

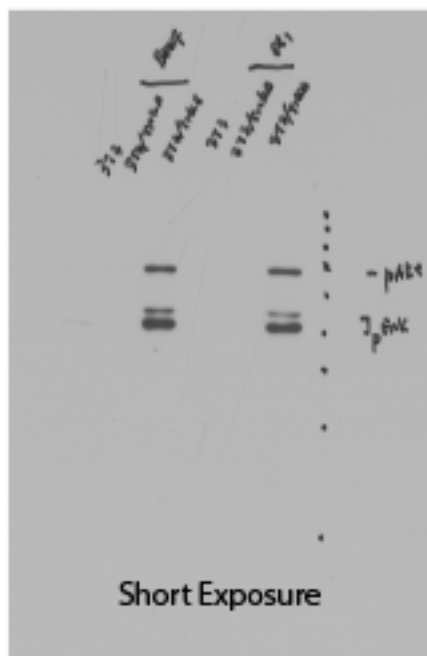

Phos. Akt & Erk (CST, 1:1000)

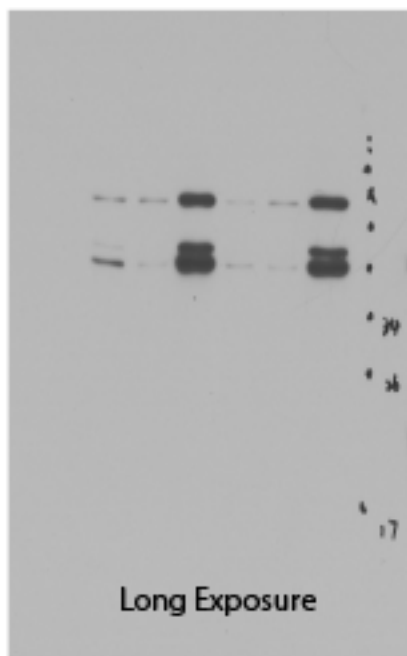

Long Exposure

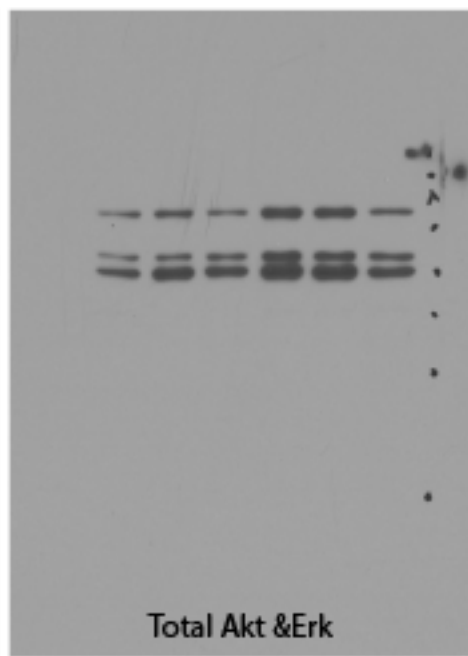

Akt & Erk (CST, 1:1000)

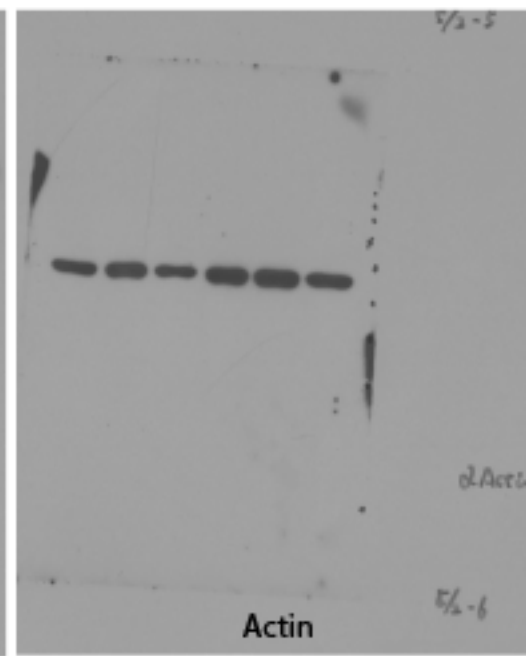

Actin (Santa Cruz, 1:1000)
