# Supplementary material for: Failure to Thrive: Impaired BDNF Transport along the Cortical–Striatal Axis in Mouse Q140 Neurons of Huntington’s Disease
Source: Biology (Basel). 2023 Jan 19;12(2):157. doi: 10.3390/biology12020157 (PMC9952218; doi:10.3390/biology12020157)
Supplement: Supplementary file 1 [file biology-12-00157-s001.zip]

Archive with 6 entries (6 files):
- biology-2041919-Figure S5.pdf
- biology-2041919-Figure S6.pdf
- biology-2041919-Firgure S1-Figure S4.pdf
- MovieS1-QD-BDNF anterograde transport in cortical axons, WT vs Q140.avi
- MovieS2-QD-BDNF retrograde transport in striatal dendrite, WT.avi
- MovieS3-QD-BDNF retrograde transport in striatal dendrites, WT vs HD.avi
