# Supplementary figures and images for: Failure to Thrive: Impaired BDNF Transport along the Cortical–Striatal Axis in Mouse Q140 Neurons of Huntington’s Disease
Source: MDPI journal article supplement (doi:10.3390/biology12020157), 2023-01-19

Figure S5: Original Figures: WB for Figure 1

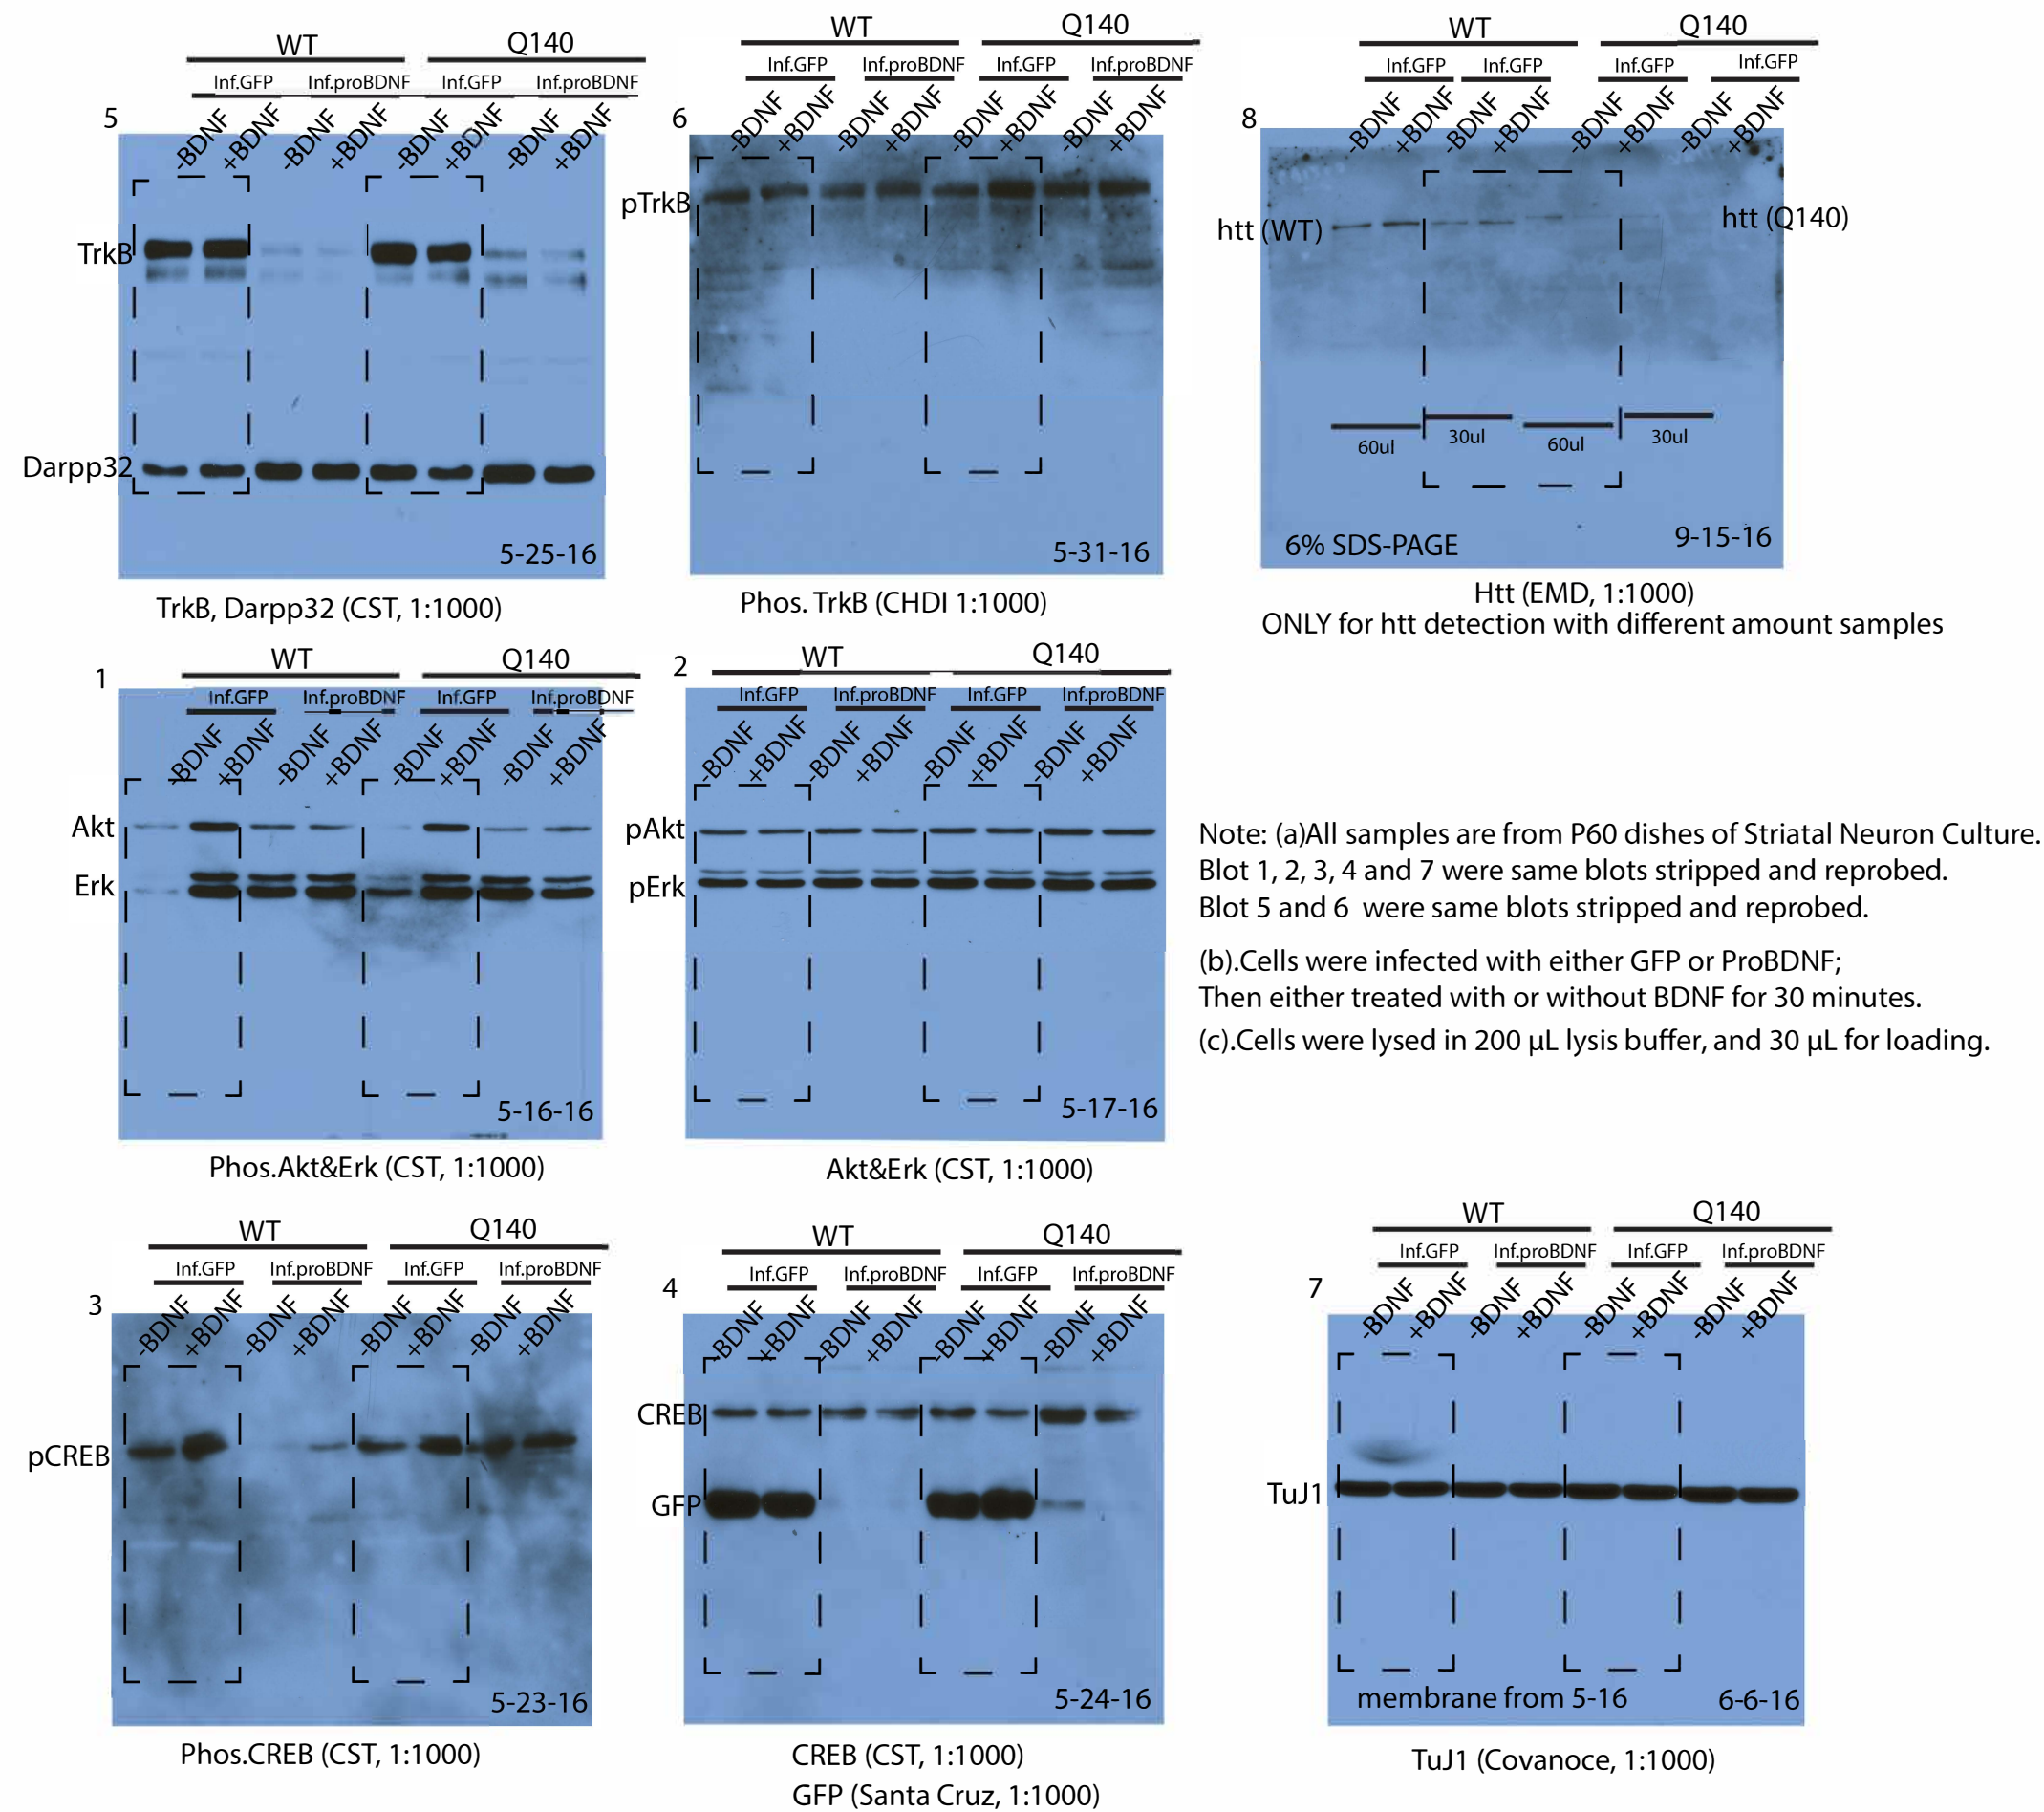

Supplement: s1 [file s1]
